# Supplementary material for: A neutral Cu-based MOF for effective quercetin extraction and conversion from natural onion juice
Source: Royal Society of Chemistry journal article supplement (doi:10.1039/c9ra04551a), 2019-01-01
Supplement: c9ra04551a1.pdf [file c9ra04551a1.pdf]

## Supporting Information

### **A Neutral Cu-Based MOF for Effective Quercetin Extraction and Conversion from Natural Onion Juice**

Rui-Qi Xiang,<sup>a</sup> Yan-Fei Niu,<sup>a</sup> Jie Han,<sup>b</sup> Yat-Long Lau,<sup>b</sup> Hai-Hong Wu<sup>a</sup> and Xiao-Li  
Zhao\*<sup>a</sup>

*<sup>a</sup>Shanghai Key Laboratory of Green Chemistry and Chemical Processes, Department  
of Chemistry, East China Normal University, 3663 North Zhongshan Road, Shanghai  
200062, P. R. China.*

*<sup>b</sup>School of Science & Technology, The Open University of Hong Kong, Kowloon,  
Hong Kong SAR, P. R. China.*

**Calculation for quercetin adsorption:**

The amount of adsorbed quercetin on compound **1**,  $q_t$  (mg quercetin/g compound **1**) was calculated by the depletion method using Equation S1.

$$q_t = \frac{C_0 - C_t}{m} V \times 1000 \quad (\text{S1})$$

Where  $C_0$  is the initial concentration (mg/mL);  $C_t$  is the concentration of the quercetin solution at any time  $t$ ; and  $m$  and  $V$  are the mass of compound **1** (mg) and volume of the quercetin solution (in ethanol, mL) used in adsorption experiment, respectively.

**Supercritical Drying:** MOFs were evacuated with supercritical CO<sub>2</sub> in a Tousimis™ Samdri® PVT-30 critical point dryer. Prior to drying, the DMF/H<sub>2</sub>O solvated MOF samples were soaked in ethanol, replacing the soaking solution every 12 hours for 24 hours, to exchange the occluded solvent for ethanol. After the 24 hours, the exchange process was complete and the ethanol-containing samples were placed inside the dryer and the ethanol was exchanged with CO<sub>2</sub> (L) over a period of 1 hour. The rate of venting of CO<sub>2</sub> (L) was always kept below the rate of filling so as to maintain a full drying chamber. After 1 hour of venting and soaking with CO<sub>2</sub> (L), the chamber was sealed and the temperature was raised to around 40 °C. This brought the chamber pressure to around 1300 psi which is above the critical point of CO<sub>2</sub>. The chamber was held above the critical point for 1 hour at which point the chamber was slowly vented over the course of 18-20 hours. The dried samples were used for N<sub>2</sub> and CO<sub>2</sub> adsorptions immediately [1].

[1] A. P. Nelson, O. K. Farha, K. L. Mulfort, and Joseph T. Hupp, *J. Am. Chem. Soc.*,

**Table S1** Crystallographic data for  $[\text{Cu}_2(\text{L})(\text{DMF})(\text{H}_2\text{O})] \cdot \text{guest}$ 

|                                           |                                                       |
|-------------------------------------------|-------------------------------------------------------|
| Complex                                   | $1 \cdot \text{guest}$                                |
| Empirical Formula                         | $\text{C}_{52}\text{H}_{41}\text{Cu}_2\text{NO}_{14}$ |
| Crystal system                            | Monoclinic                                            |
| Space group                               | $C2/c$                                                |
| $a/\text{\AA}$                            | 32.915(4)                                             |
| $b/\text{\AA}$                            | 16.124(2)                                             |
| $c/\text{\AA}$                            | 34.303(4)                                             |
| $\alpha/^\circ$                           | 90                                                    |
| $\beta/^\circ$                            | 91.696(4)                                             |
| $\gamma/^\circ$                           | 90                                                    |
| $V/\text{\AA}^3$                          | 18197(4)                                              |
| $Z$                                       | 8                                                     |
| $\rho_{\text{calcd.}} (\text{g cm}^{-3})$ | 0.753                                                 |
| $\mu (\text{mm}^{-1})$                    | 2.721                                                 |
| $F(000)$                                  | 4240                                                  |
| $\theta$ range, $^\circ$                  | 2.896-56.32                                           |
| Radiation                                 | $\text{GaK}\alpha (\lambda = 1.34139 \text{ \AA})$    |
| $R_{\text{int}}$                          | 0.2043                                                |
| Final $R$ indexes [ $I > 2\sigma(I)$ ]    | $R_1 = 0.0928,$<br>$wR_2 = 0.2177$                    |
| Final $R$ indexes [all data]              | $R_1 = 0.2121,$<br>$wR_2 = 0.2798$                    |

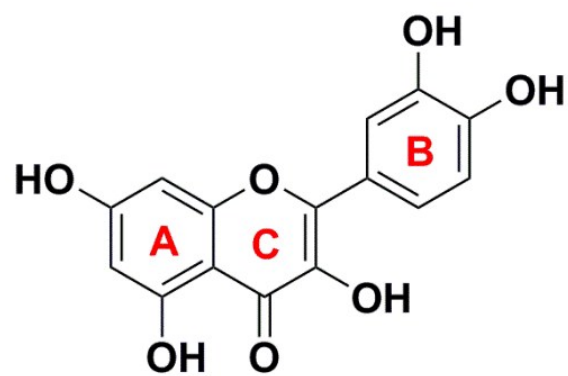

**Fig. S1** Chemical structure of quercetin.

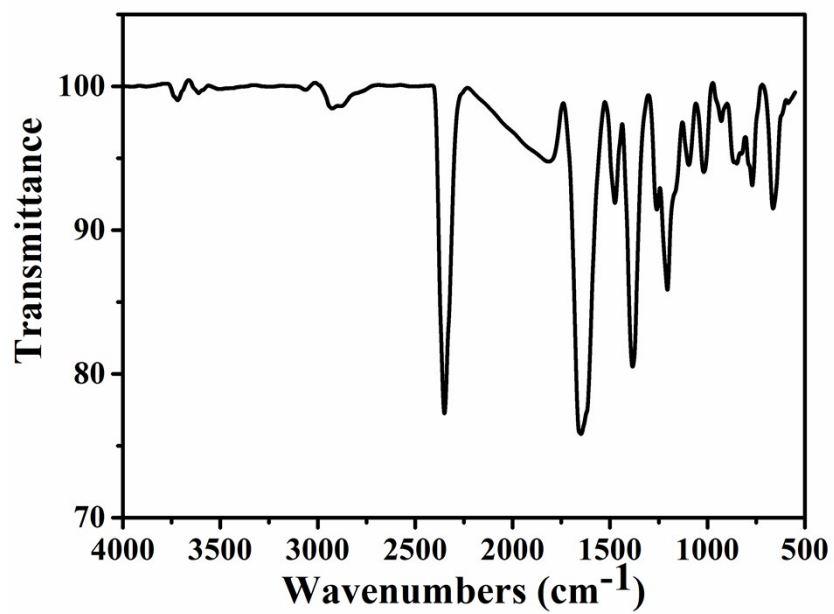

Fig. S2 IR spectra of compound 1·*guest*.

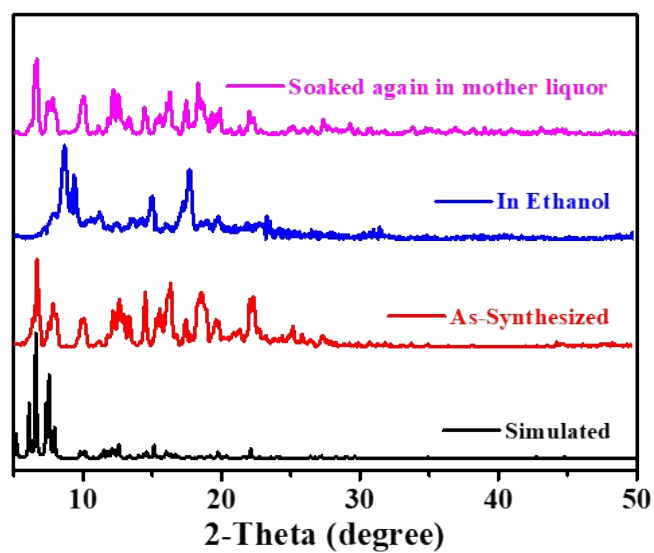

**Fig. S3** X-ray powder diffraction patterns for **1.guest** (black, simulated; red, as synthesized; blue, soaked in EtOH for 24h; pink, soaked again in mother liquor for 24 h).

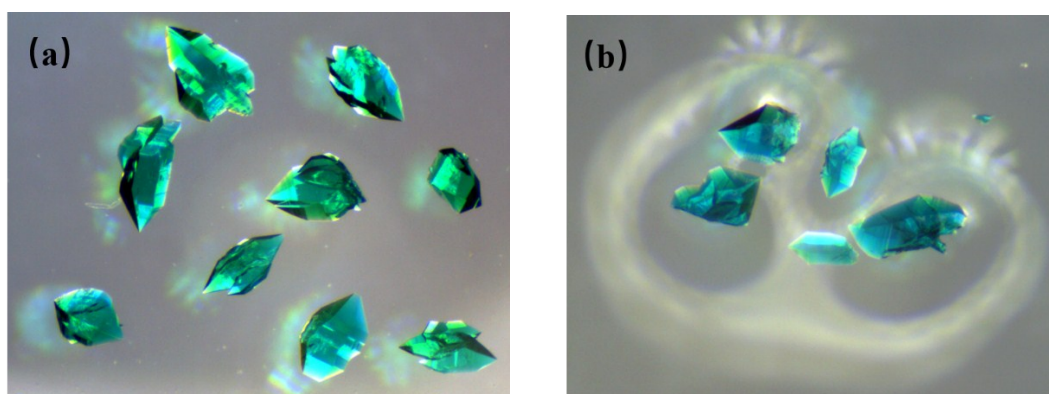

**Fig. S4** Photos of crystals. (a) As-synthesized compound **1-guest**; (b) Immersion in ethanol for 24 h.

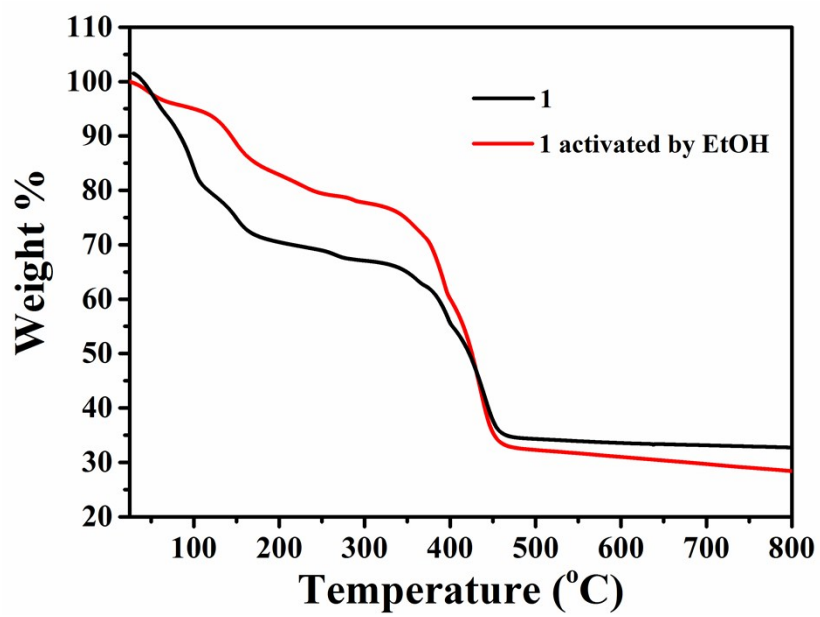

**Fig. S5** TGA curves of **1.guest** (black) and EtOH-exchanged (red) sample, respectively.



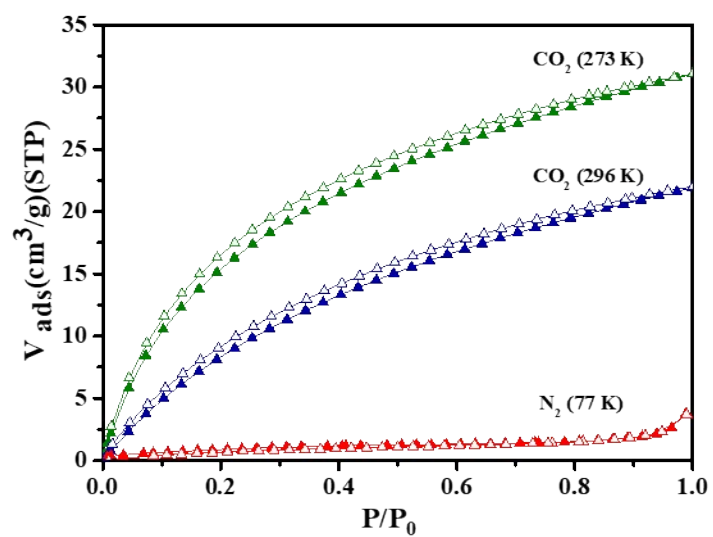

**Fig. S6**  $\text{N}_2$  and  $\text{CO}_2$  sorption isotherms of **1.guest**.

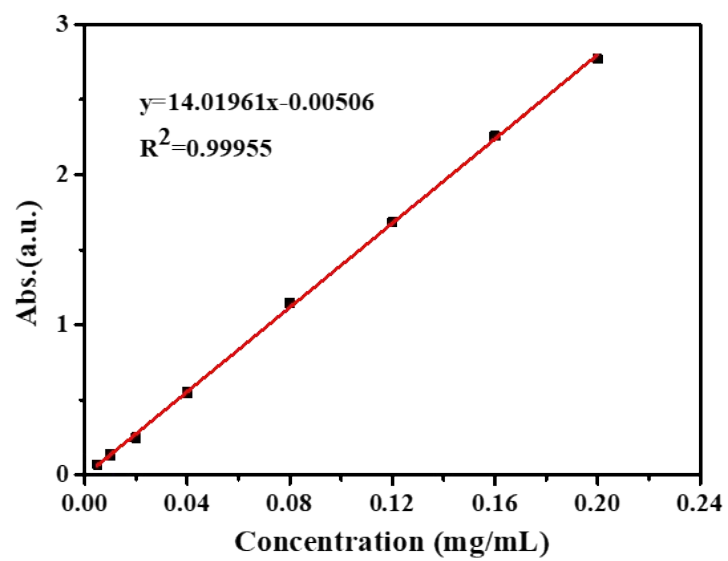

**Fig. S7** Standard curve of quercetin in ethanol solution.

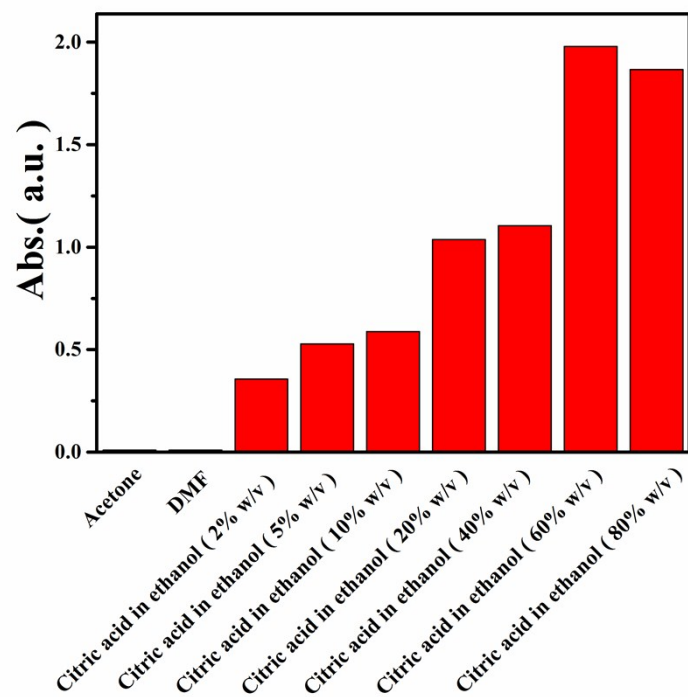

**Fig. S8** Recovery of quercetin from QT@1 using different solvents when 10 mL was used for 15 mg quercetin adsorbed by compound 1.

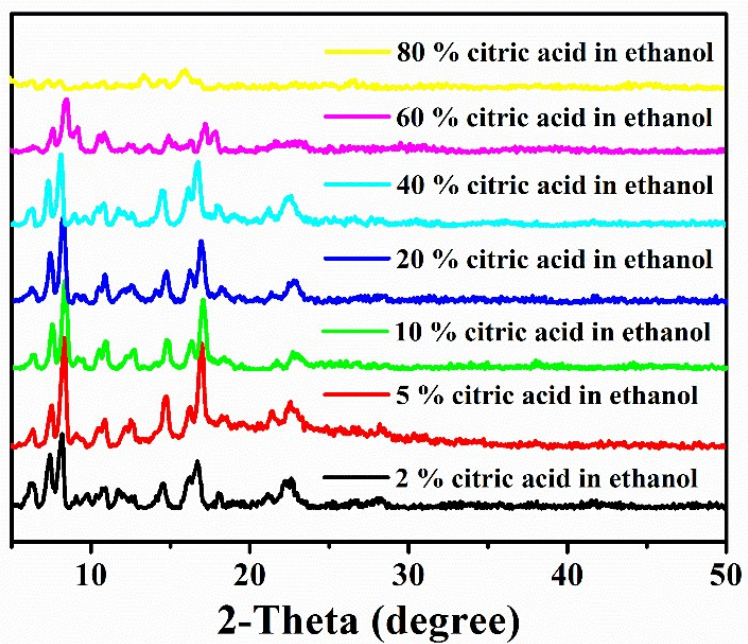

**Fig. S9** The PXR D diffraction patterns of QT@1 in a range of ethanolic citric acid solution at different concentrations of citric acid.

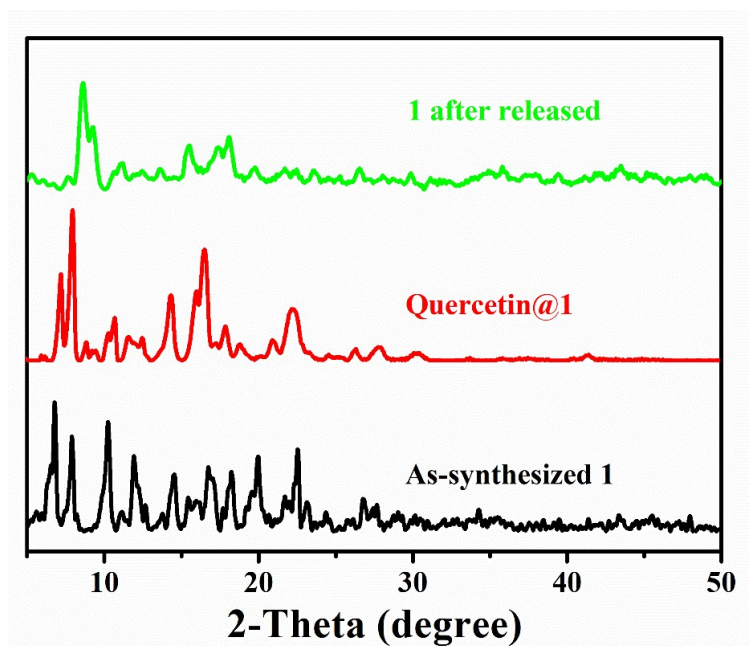

**Fig. S10** PXR D diffraction patterns of **1·guest**, **QT@1** and **QT@1** in 40% w/v ethanolic citric acid for 24 h.

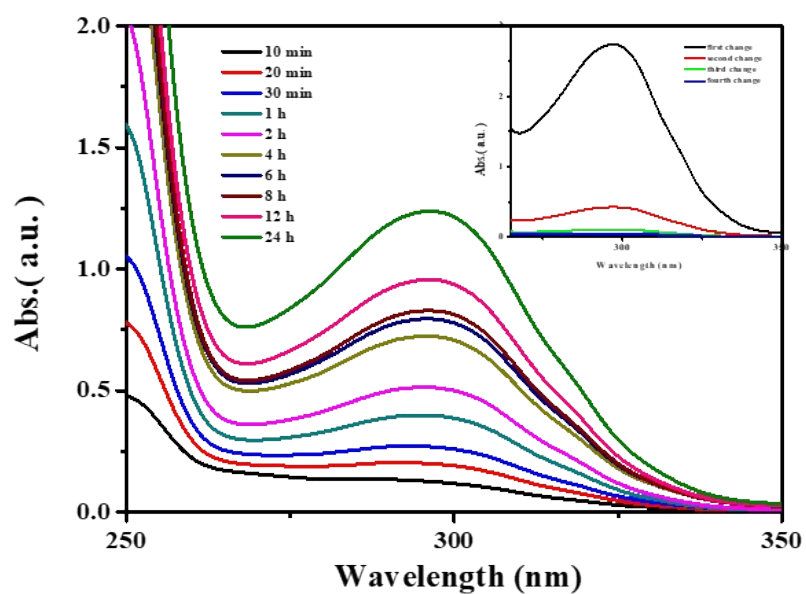

**Fig. S11** Time dependent UV-vis spectra of 15 mg of QT @1 in 50 mL 40% w /v ethanolic citric acid solution; inset: UV-vis spectra of four replacements of 10 mL 40% w/v ethanolic citric acid solution after desorption 24 h.

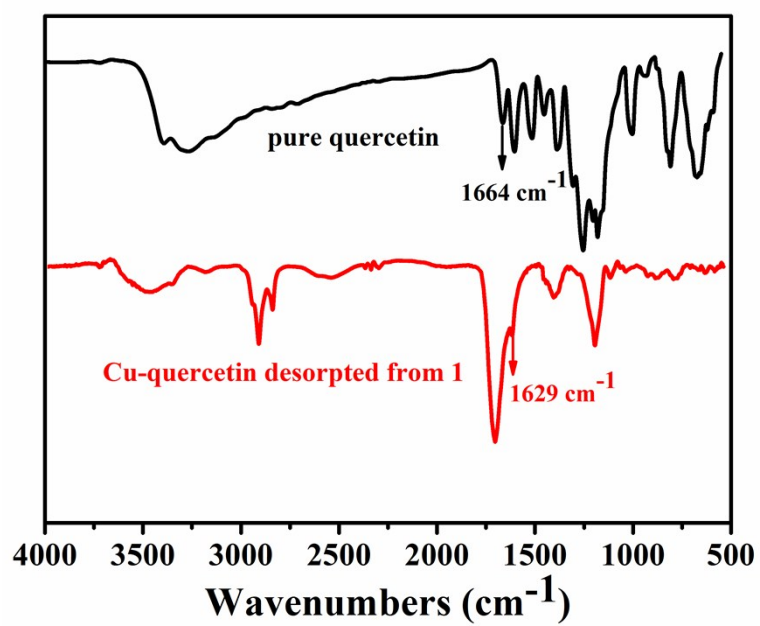

**Fig. S12** IR spectra of the Cu-QT from desorption of QT@1.

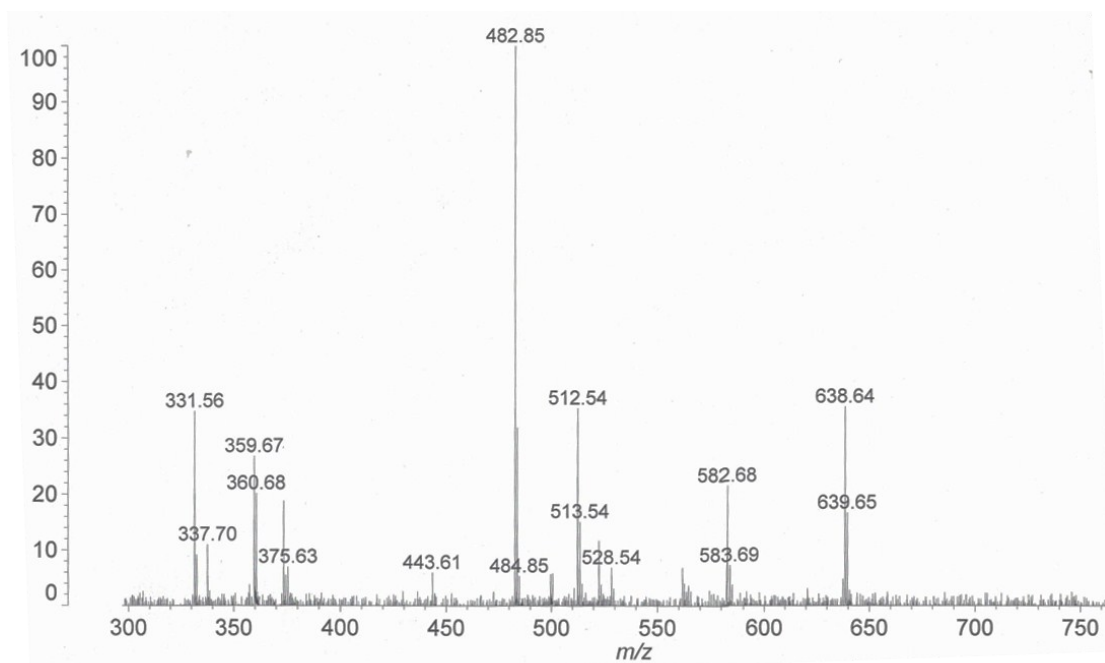

**Fig. S13** ESI-MS spectrum for the Cu-QT generated from desorption of QT@ 1.



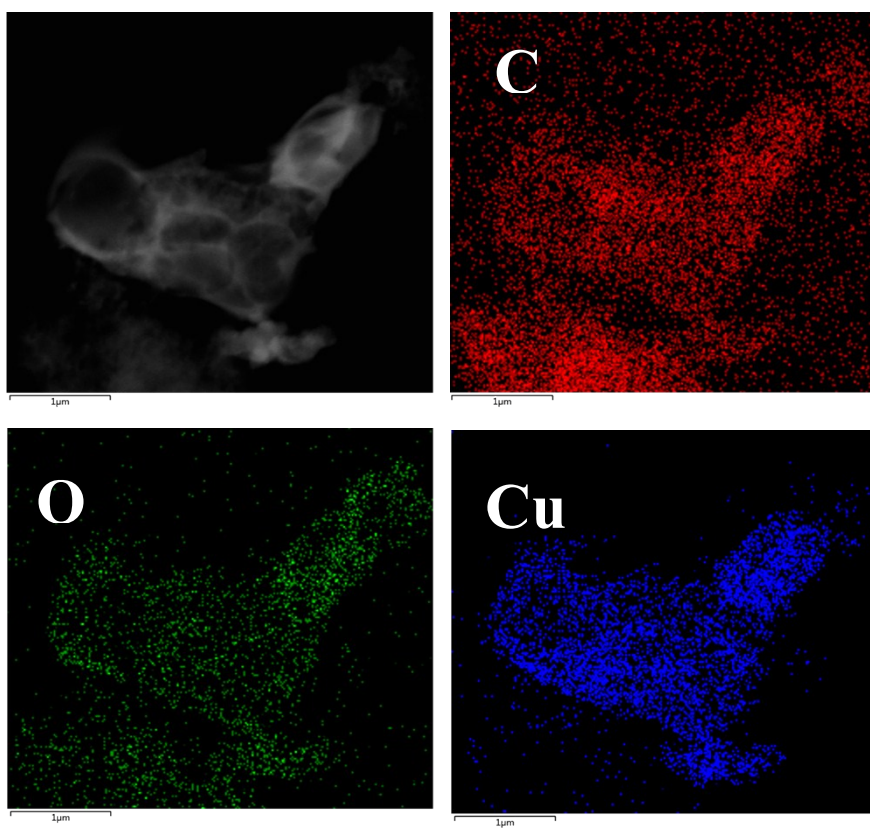

**Fig. S14** TEM-EDS mapping of desorption Cu-quercerin.

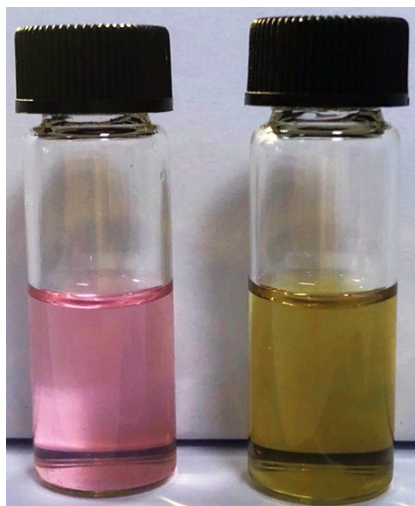

**Fig. S15** Color change of the onion solution before and after extraction

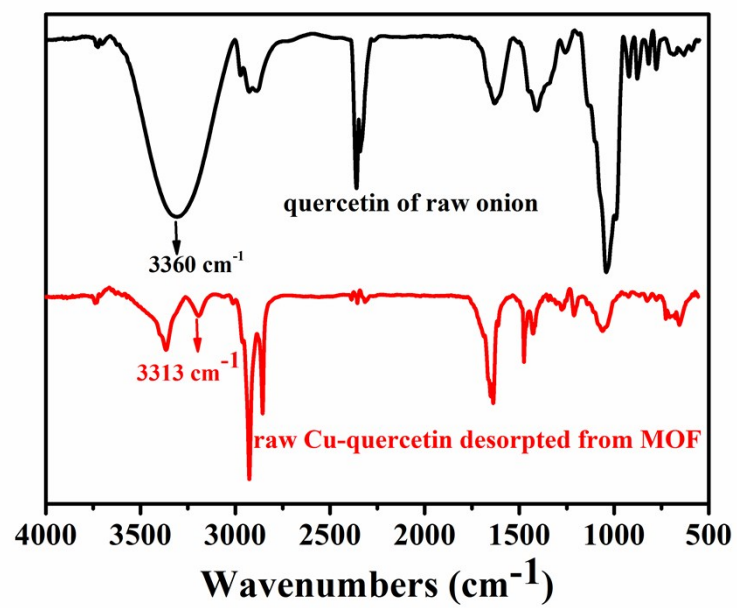

**Fig. S16** IR spectrum of the quercetin of raw onion (black) and the natural quercetin converted in ethanol by compound **1** (red).

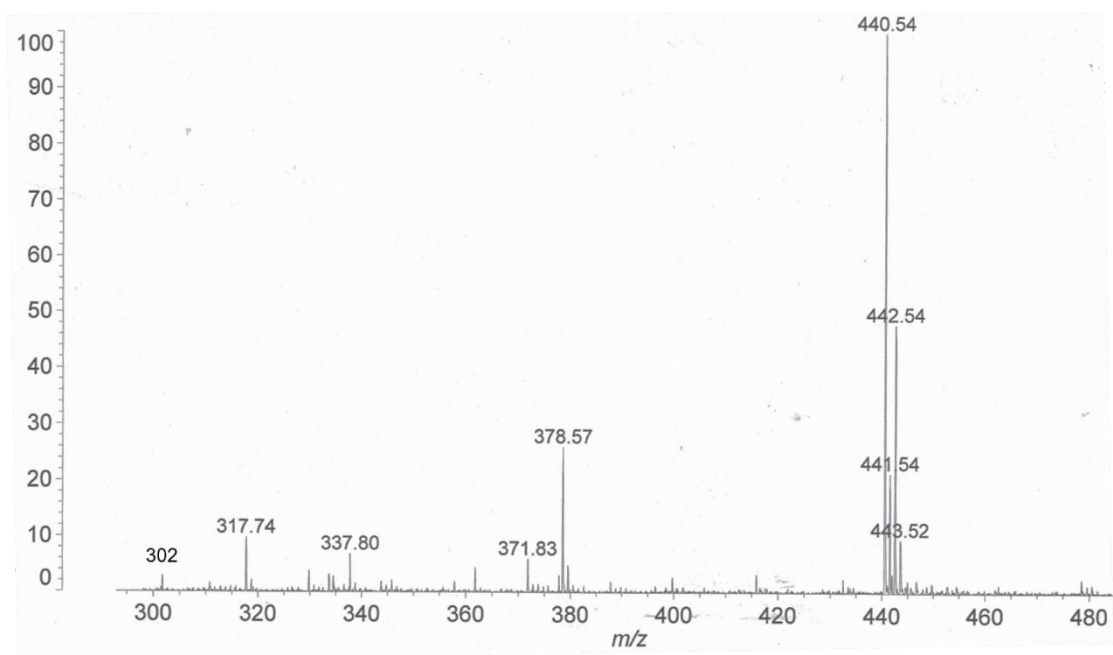

**Fig. S17** The ESI-MS spectrum for the filtrate of the natural quercetin converted in ethanol by compound **1**.

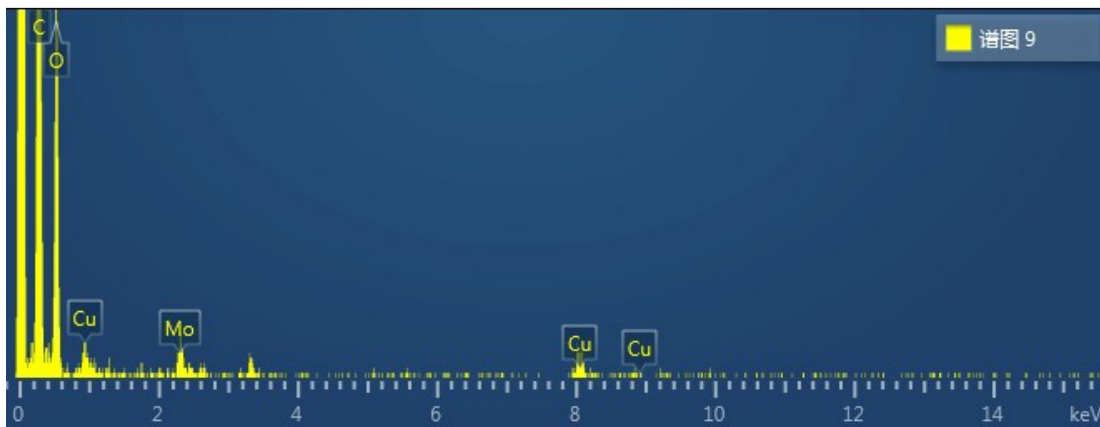

**Fig. S18** TEM-EDS spectrum of Cu-natural QT.

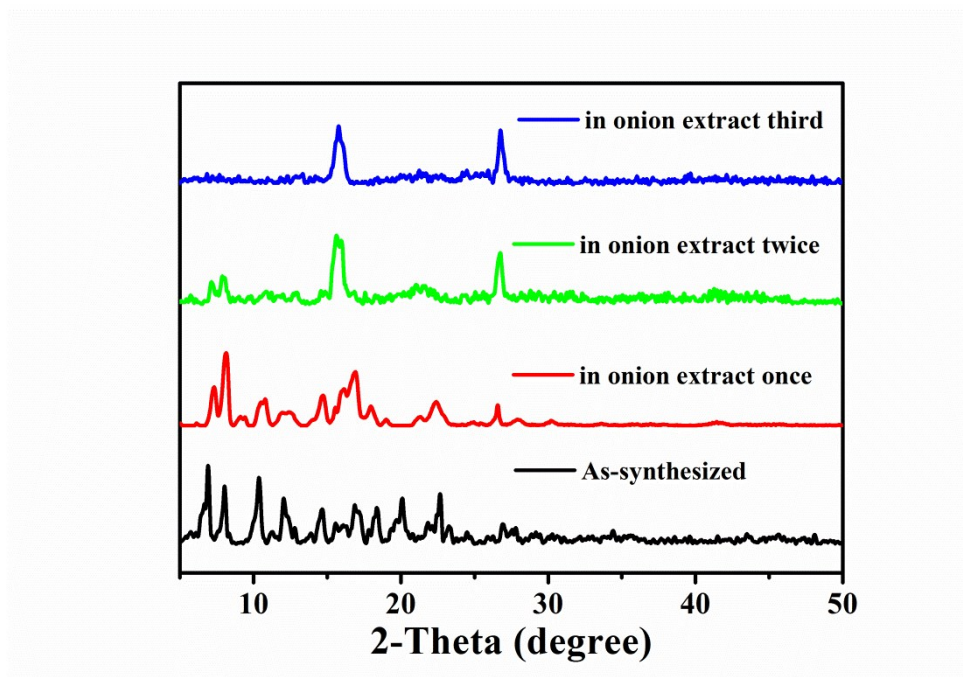

**Fig. S19** The PXRD diffraction patterns of **1** in 1-3 runs in onion conversion.

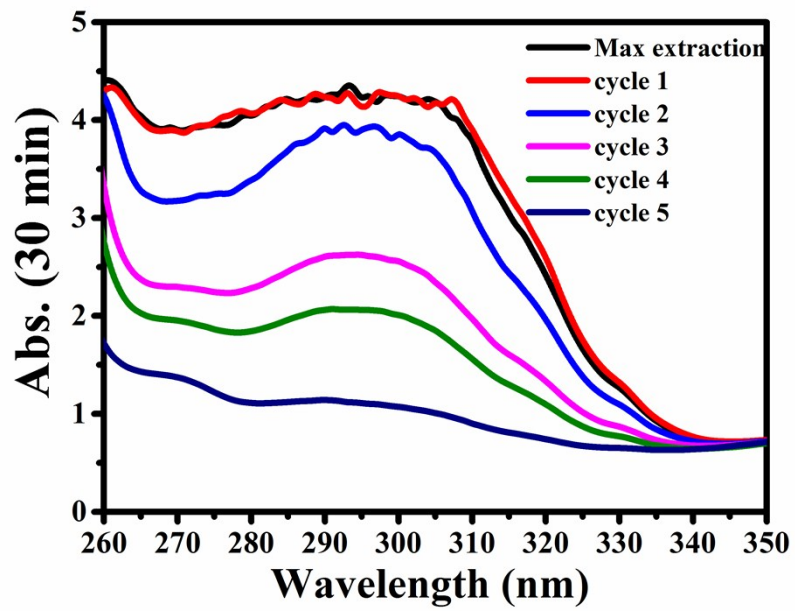

**Fig. S20** Time dependence UV-vis spectra for five cycles.

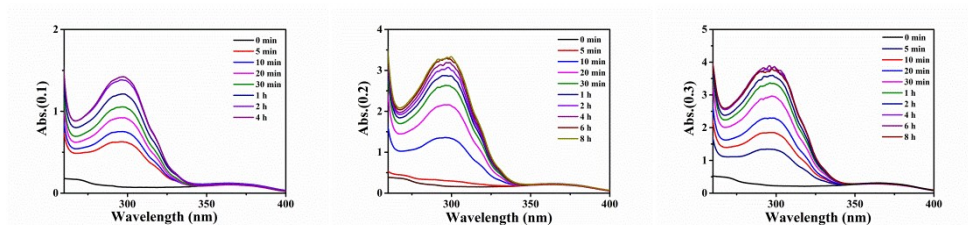

**Fig. S21** Time dependence UV-vis spectra of 2 mL onion ethanol solution with the initial absorbance of about 0.1, 0.2, 0.3 with 5 mg **1**.
